# Supplementary material
Source: MDPI journal article supplement (https://www.mdpi.com/2073-4344/13/1/107)
Supplement: s1 [file s1]

## Supporting Information

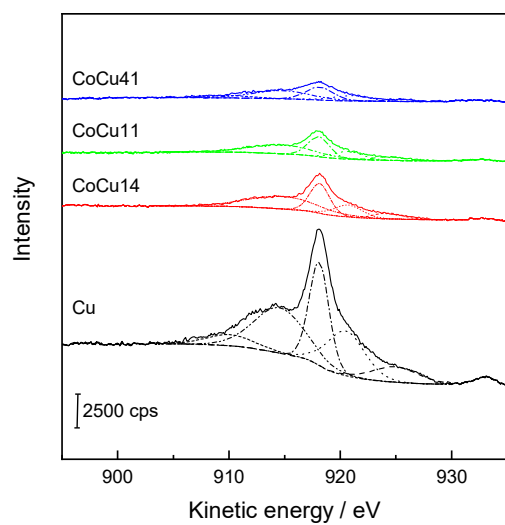

**Figure S1.** The Cu LMM XPS spectra of the Co-Cu oxide catalysts.

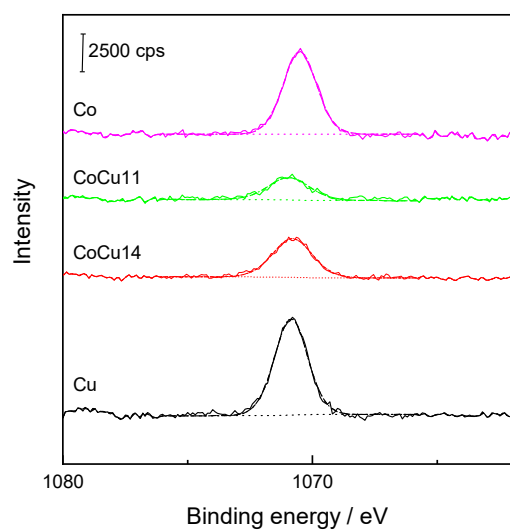

**Figure S2.** The Na 1s XPS spectra of the Co-Cu oxide catalysts.

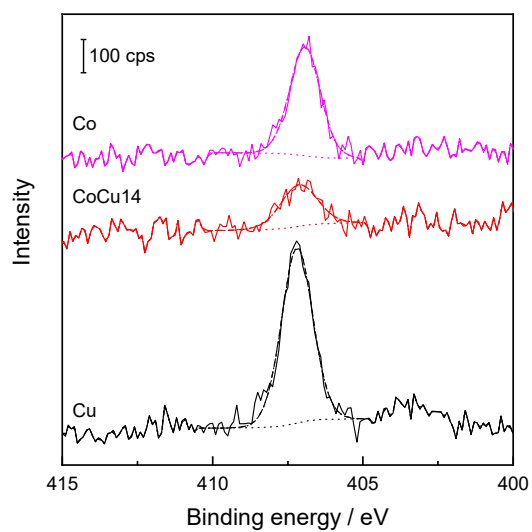

**Figure S3.** The N 1 s XPS spectra of the Co-Cu oxide catalysts.

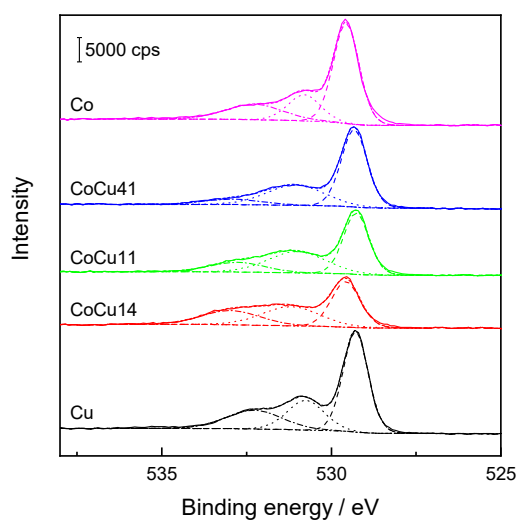

**Figure S4.** The O 1 s XPS spectra of the Co-Cu oxide catalysts.

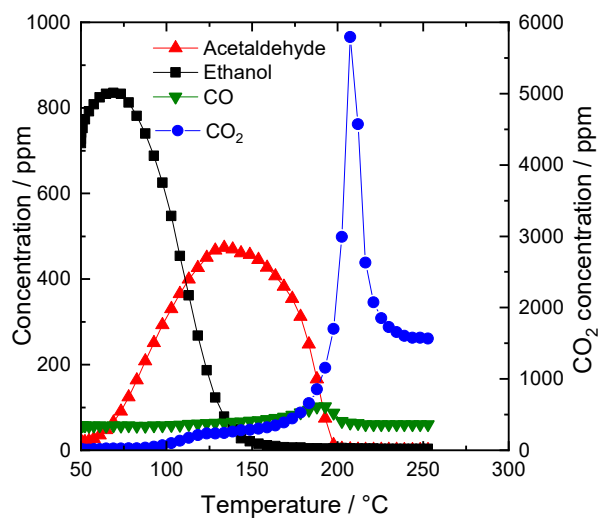

**Figure S5.** Concentration profiles of ethanol, acetaldehyde, carbon monoxide, and carbon dioxide during the light-off experiment over the Co catalyst.

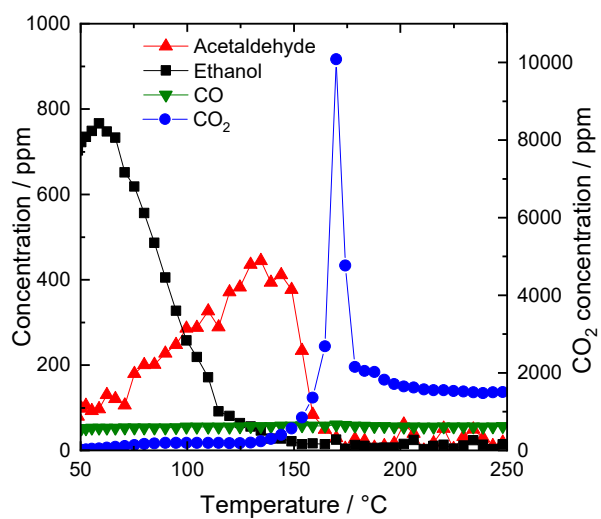

**Figure S6.** Concentration profiles of ethanol, acetaldehyde, carbon monoxide, and carbon dioxide during the light-off experiment over the CoCu11 catalyst.

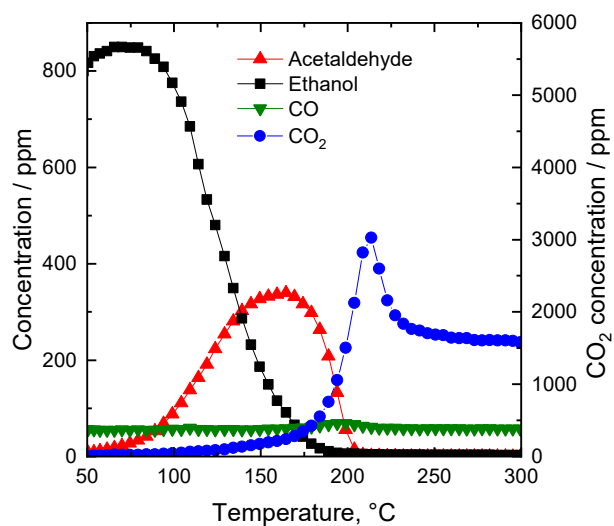

**Figure S7.** Concentration profiles of ethanol, acetaldehyde, carbon monoxide, and carbon dioxide during the light-off experiment over the CoCu14 catalyst.

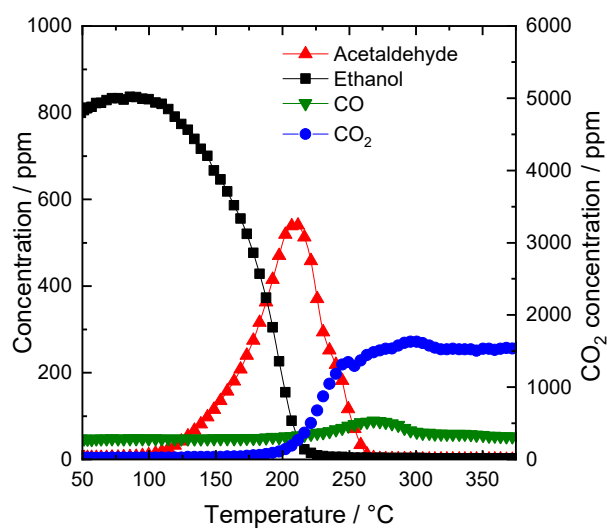

**Figure S8.** Concentration profiles of ethanol, acetaldehyde, carbon monoxide, and carbon dioxide during the light-off experiment over the Cu catalyst.
